# Supplementary material for: Designing a sulphonic acid functionalized benzimidazolium based poly(ionic liquid) for efficient adsorption of hexavalent chromium
Source: Royal Society of Chemistry journal article supplement (doi:10.1039/c6ra01219a), 2016-01-01
Supplement: c6ra01219a1.pdf [file c6ra01219a1.pdf]

## Supporting information

# Designing of sulphonic acid functionalized benzimidazolium based poly(ionic liquid) for efficient adsorption of hexavalent chromium

Avinash Ganesh Khiratkar, S. Senthil Kumar and Pundlik Rambhau Bhagat\*

Department of Chemistry, School of Advanced Sciences, VIT University, Vellore-632014, India.

| <b>Table of contents:</b>                                                                                                                                   | <b>Page number</b> |
|-------------------------------------------------------------------------------------------------------------------------------------------------------------|--------------------|
| <b>Fig. S1.</b> <sup>1</sup> H NMR spectrum of 1-(4-vinylbenyl)-1H-benzimidazole (CDCl <sub>3</sub> )                                                       | 2                  |
| <b>Fig. S2.</b> <sup>13</sup> C NMR spectrum of 1-(4-vinylbenyl)-1H-benzimidazole (CDCl <sub>3</sub> )                                                      | 3                  |
| <b>Fig. S3.</b> Chromatogram of 1-(4-vinylbenyl)-1H-benzimidazole                                                                                           | 4                  |
| <b>Fig. S4.</b> GC-MS spectrum of 1-(4-vinylbenyl)-1H-benzimidazole                                                                                         | 5                  |
| <b>Fig. S5.</b> <sup>1</sup> H NMR spectrum of poly-(1-(4-vinylbenyl)-1H-benzimidazole-co-styrene) (CDCl <sub>3</sub> )                                     | 6                  |
| <b>Fig. S6.</b> <sup>13</sup> C NMR spectrum of poly-(1-(4-vinylbenyl)-1H-benzimidazole-co-styrene) (CDCl <sub>3</sub> )                                    | 7                  |
| <b>Fig. S7.</b> <sup>1</sup> H NMR spectrum of poly-(4-(1-(4-vinylbenzyl)-1H-benzimidazol-co-styrene-3-ium-3-yl)butane-1-sulphonate (DMSO-d <sub>6</sub> )  | 8                  |
| <b>Fig. S8.</b> <sup>13</sup> C NMR spectrum of poly-(4-(1-(4-vinylbenzyl)-1H-benzimidazol-co-styrene-3-ium-3-yl)butane-1-sulphonate (DMSO-d <sub>6</sub> ) | 9                  |
| <b>Fig. S9.</b> <sup>1</sup> H NMR of the SBPIL (DMSO-d <sub>6</sub> )                                                                                      | 10                 |
| <b>Fig. S10.</b> XRD pattern of SBPIL                                                                                                                       | 11                 |
| <b>Fig. S11.</b> TGA of SBPIL                                                                                                                               | 12                 |

Signature SIF VIT VELLORE  
VBCBIM

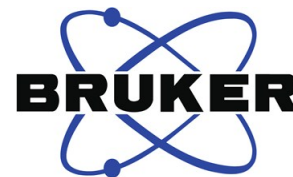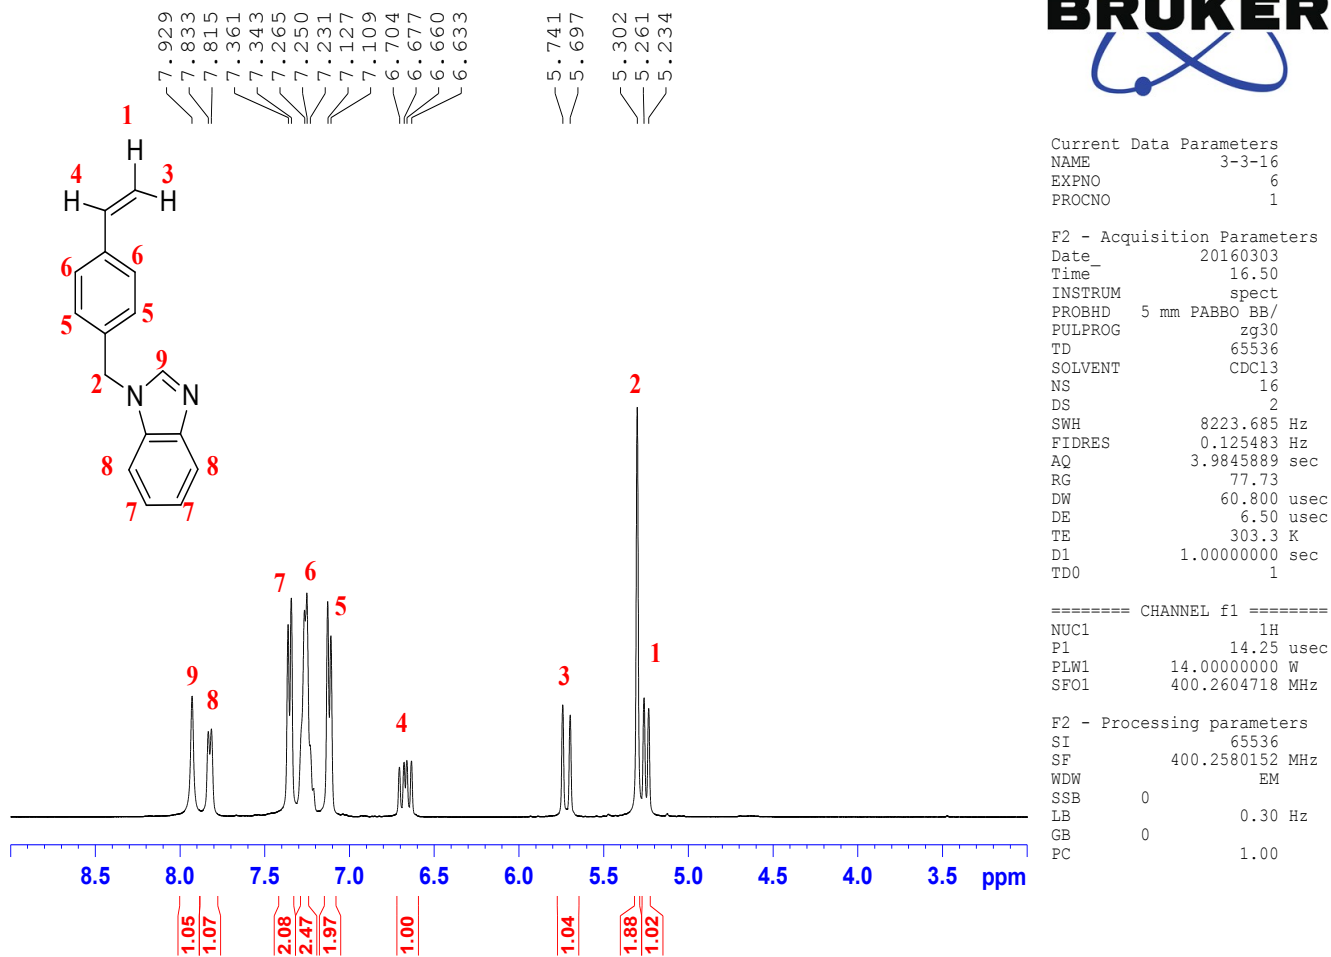

Fig. S1: <sup>1</sup>H NMR spectrum of 1-(4-Vinylbenzyl)-1H-benzimidazole (CDCl<sub>3</sub>).

Signature SIF VIT VELLORE  
VBCBIM

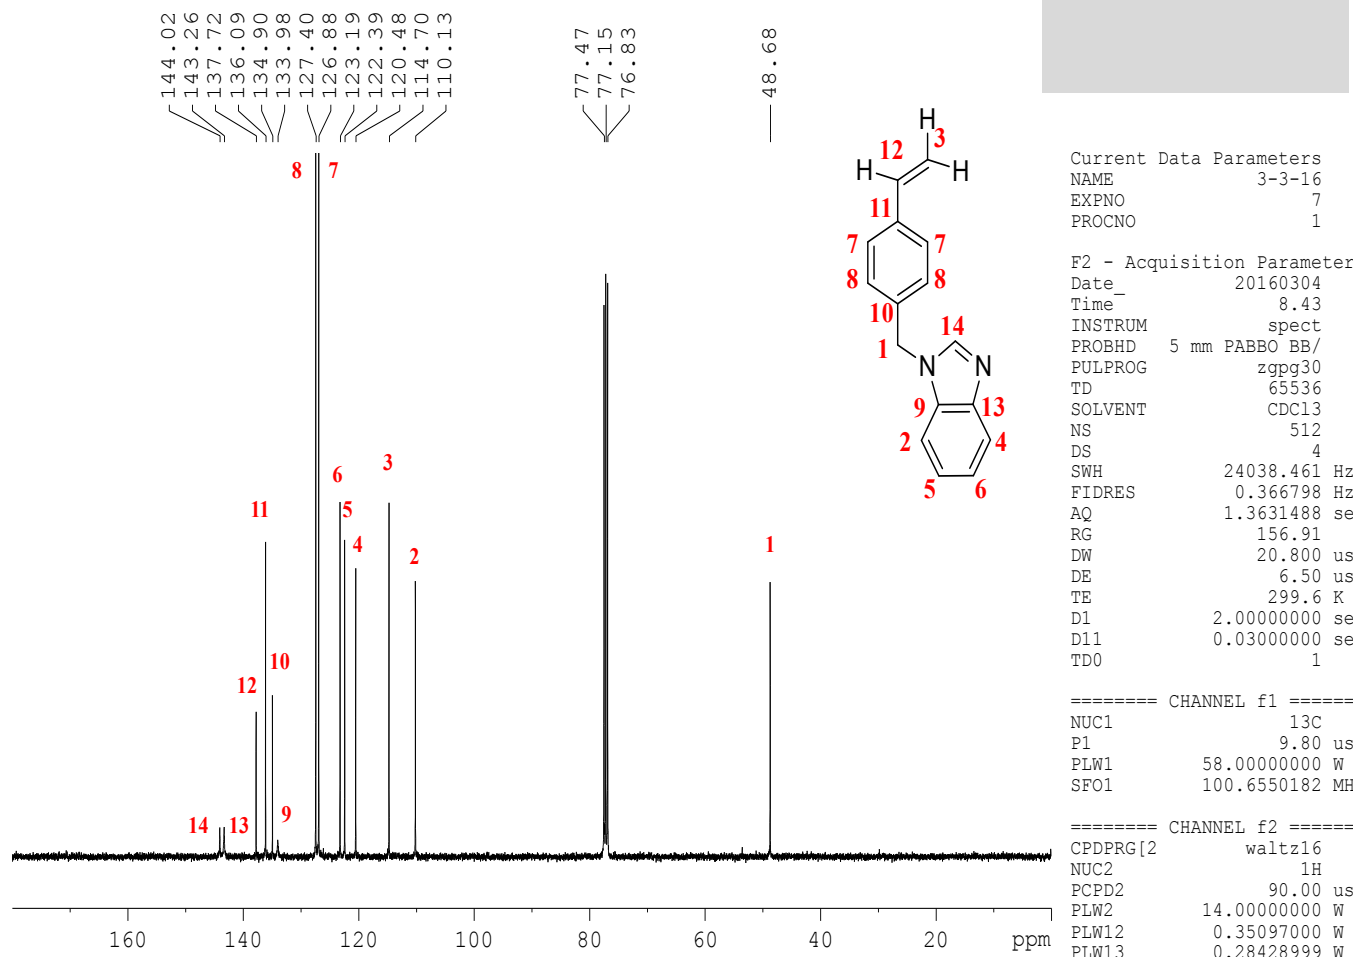

Fig. S2:  $^{13}\text{C}$  NMR spectrum of 1-(4-Vinylbenzyl)-1H-benzimidazole ( $\text{CDCl}_3$ ).

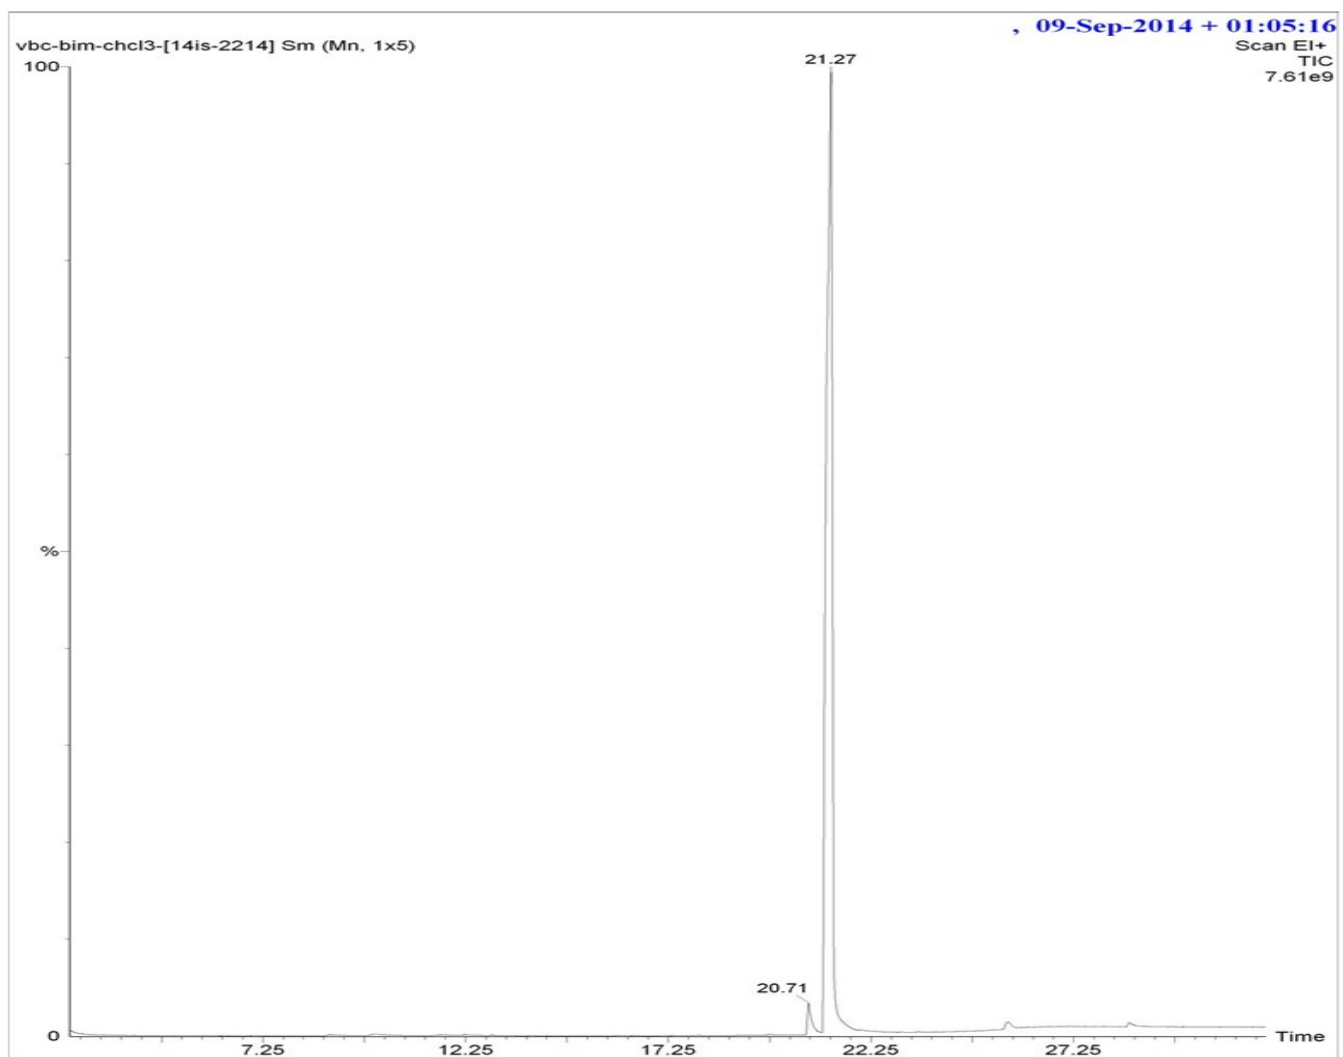

**Fig. S3:** Chromatogram of 1-(4-Vinylbenzyl)-1H-benzimidazole.

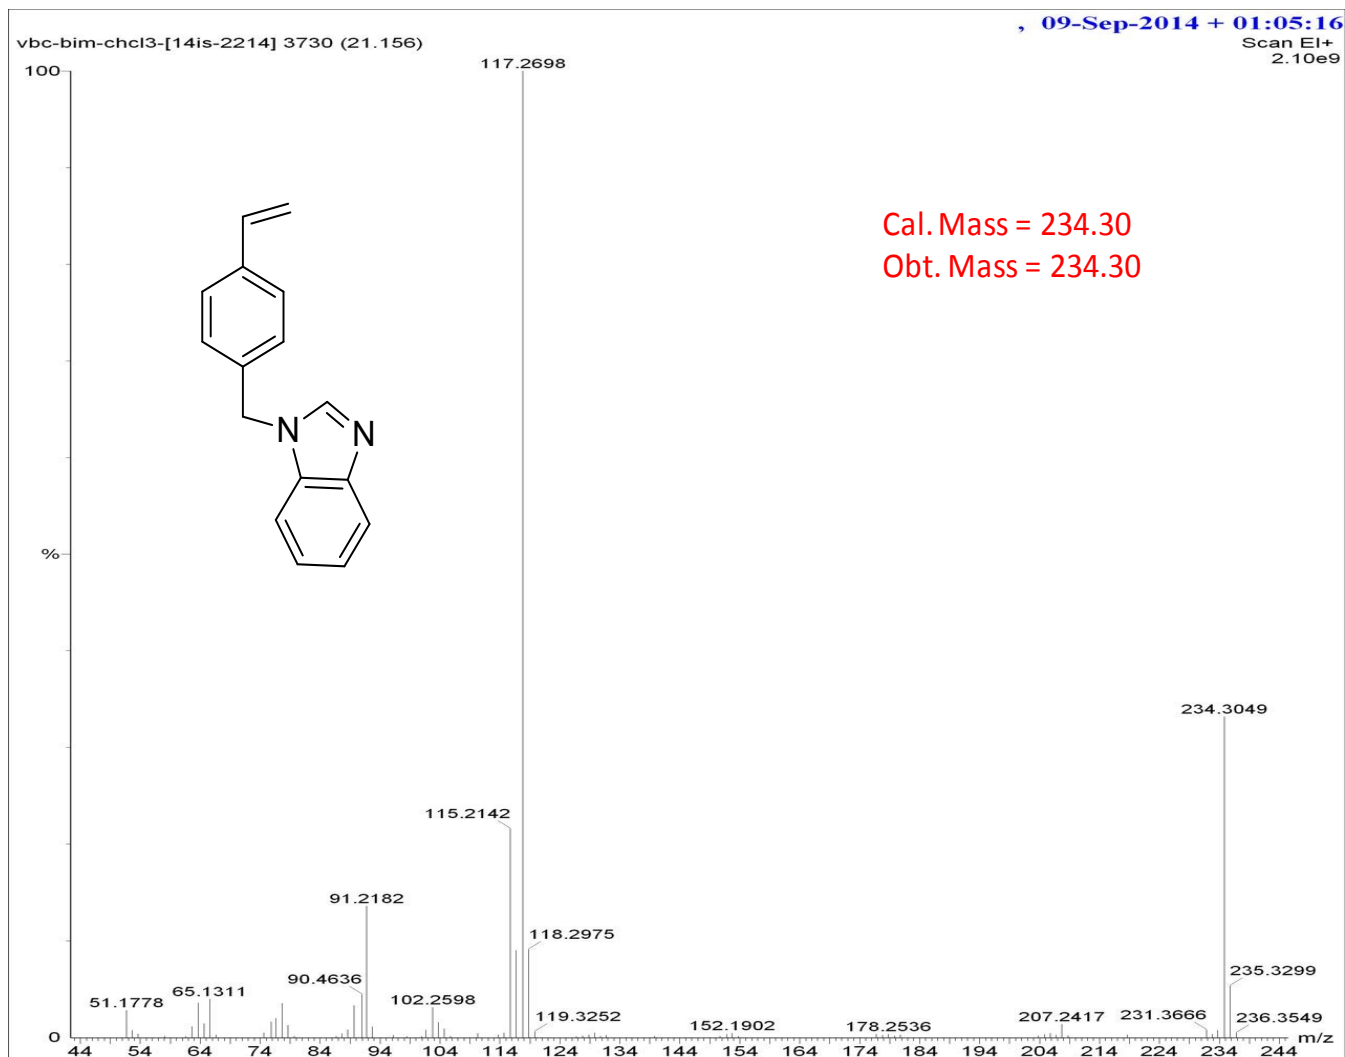

**Fig. S4:** GC-MS spectrum of 1-(4-Vinylbenzyl)-1H-benzimidazole.

Signature SIF VIT VELLORE  
COP-I

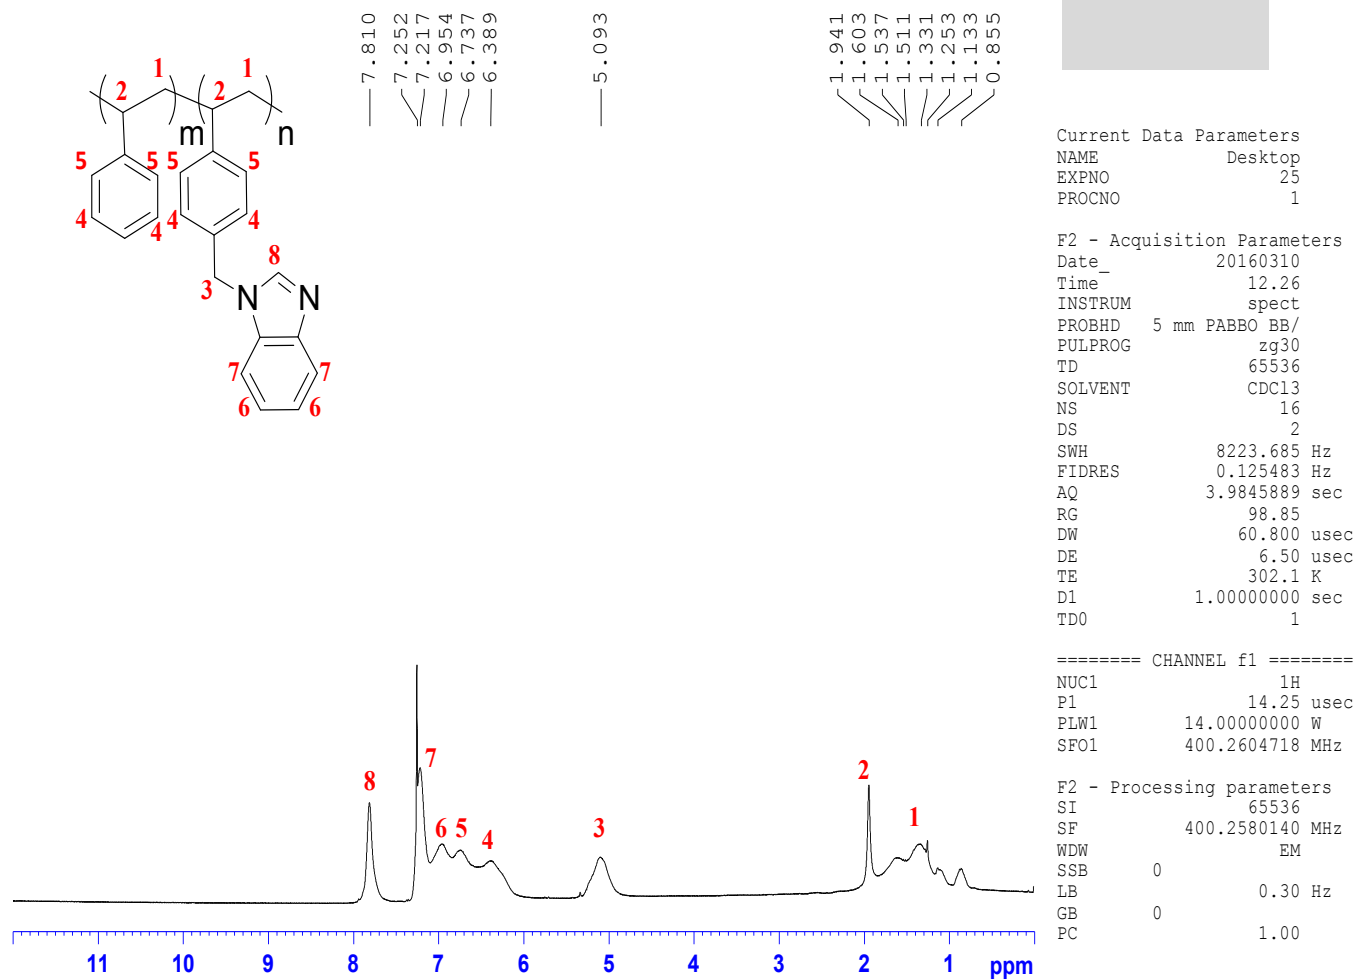

**Fig. S5:**  $^1\text{H}$  NMR spectrum of poly(1-(4-Vinylbenzyl-1H-benzimidazole-co-styrene) ( $\text{CDCl}_3$ ).

Signature SIF VIT VELLORE  
COP-2

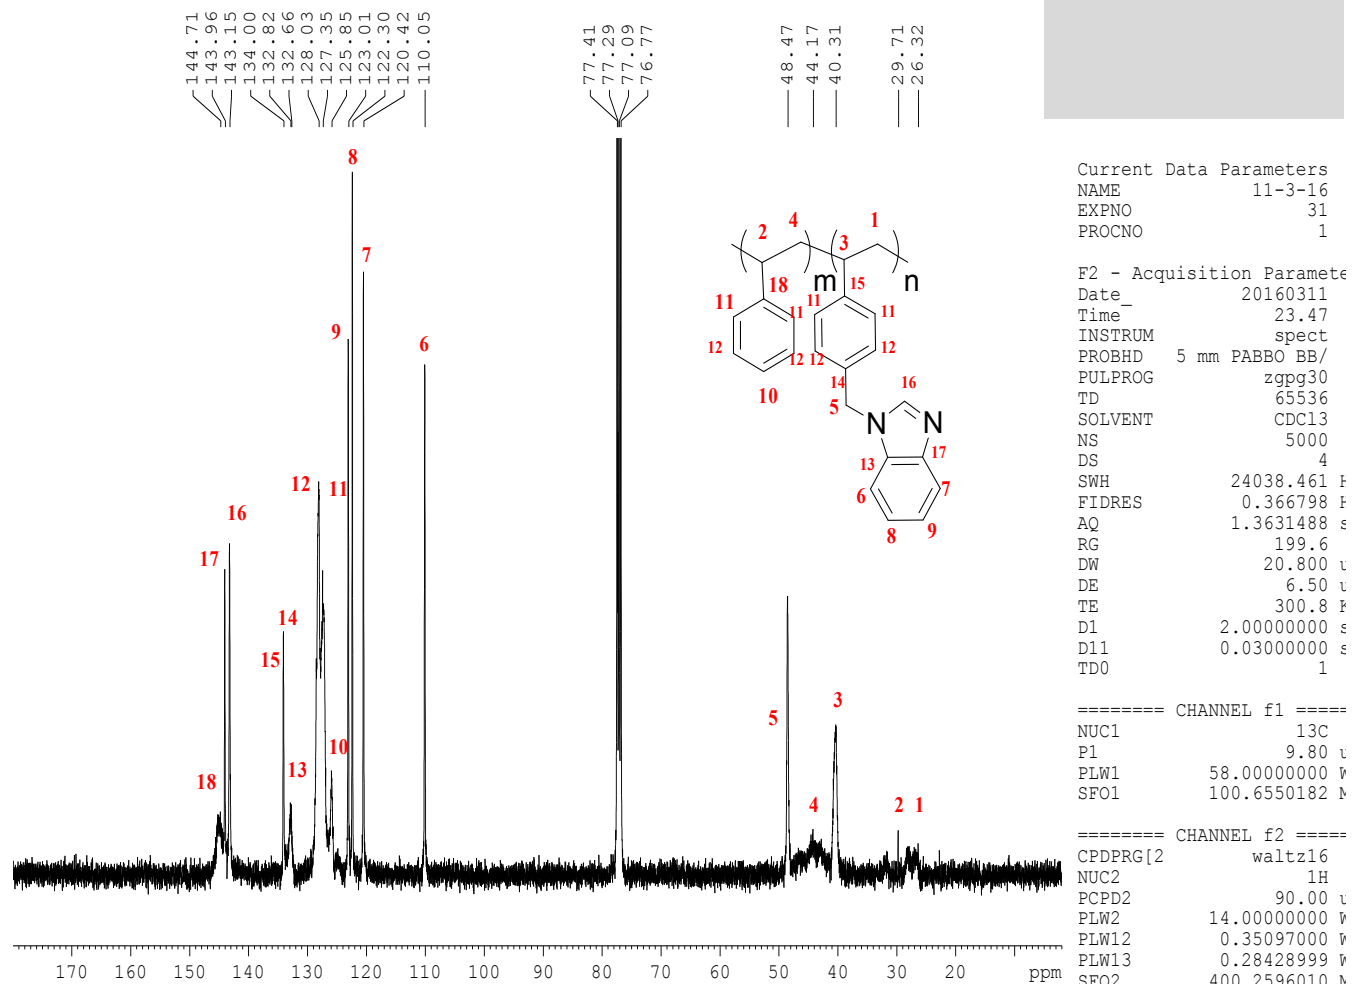

**Fig. S6:**  $^{13}\text{C}$  NMR spectrum of poly(1-(4-Vinylbenzyl-1H-benzimidazole-co-styrene) ( $\text{CDCl}_3$ ).

Signature SIF VIT VELLORE  
Z-3

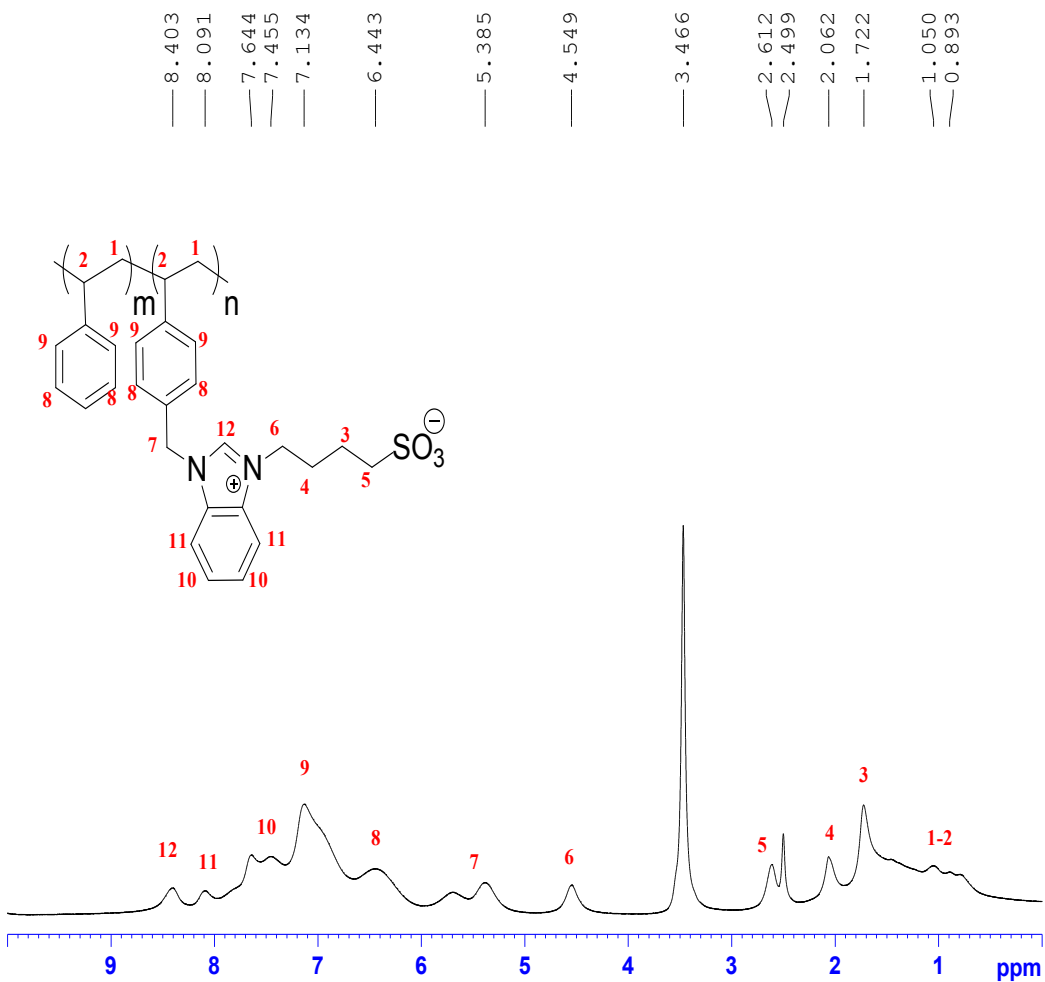

Current Data Parameters  
NAME 21-3-16 good to keep  
EXPNO 74  
PROCNO 1

F2 - Acquisition Parameters  
Date\_ 20160320  
Time\_ 17.00  
INSTRUM spect  
PROBHD 5 mm PABBO BB/  
PULPROG zg30  
TD 65536  
SOLVENT DMSO  
NS 16  
DS 2  
SWH 8223.685 Hz  
FIDRES 0.125483 Hz  
AQ 3.9845889 sec  
RG 35.49  
DW 60.800 usec  
DE 6.50 usec  
TE 299.5 K  
D1 1.00000000 sec  
TD0 1

=====  
CHANNEL f1  
NUC1 1H  
P1 14.25 usec  
PLW1 14.00000000 W  
SF01 400.2604718 MHz

F2 - Processing parameters  
SI 65536  
SF 400.2580070 MHz  
WDW EM  
SSB 0  
LB 0.30 Hz  
GB 0  
PC 1.00

**Fig. S7:**  $^1\text{H}$  NMR spectrum of the poly-(4-(1-(4-vinylbenzyl)-1H-benzimidazol-co-styrene-3-yl)butane-1-sulphonate (DMSO- $d_6$ ).



Signature SIF VIT VELLORE  
Z-3

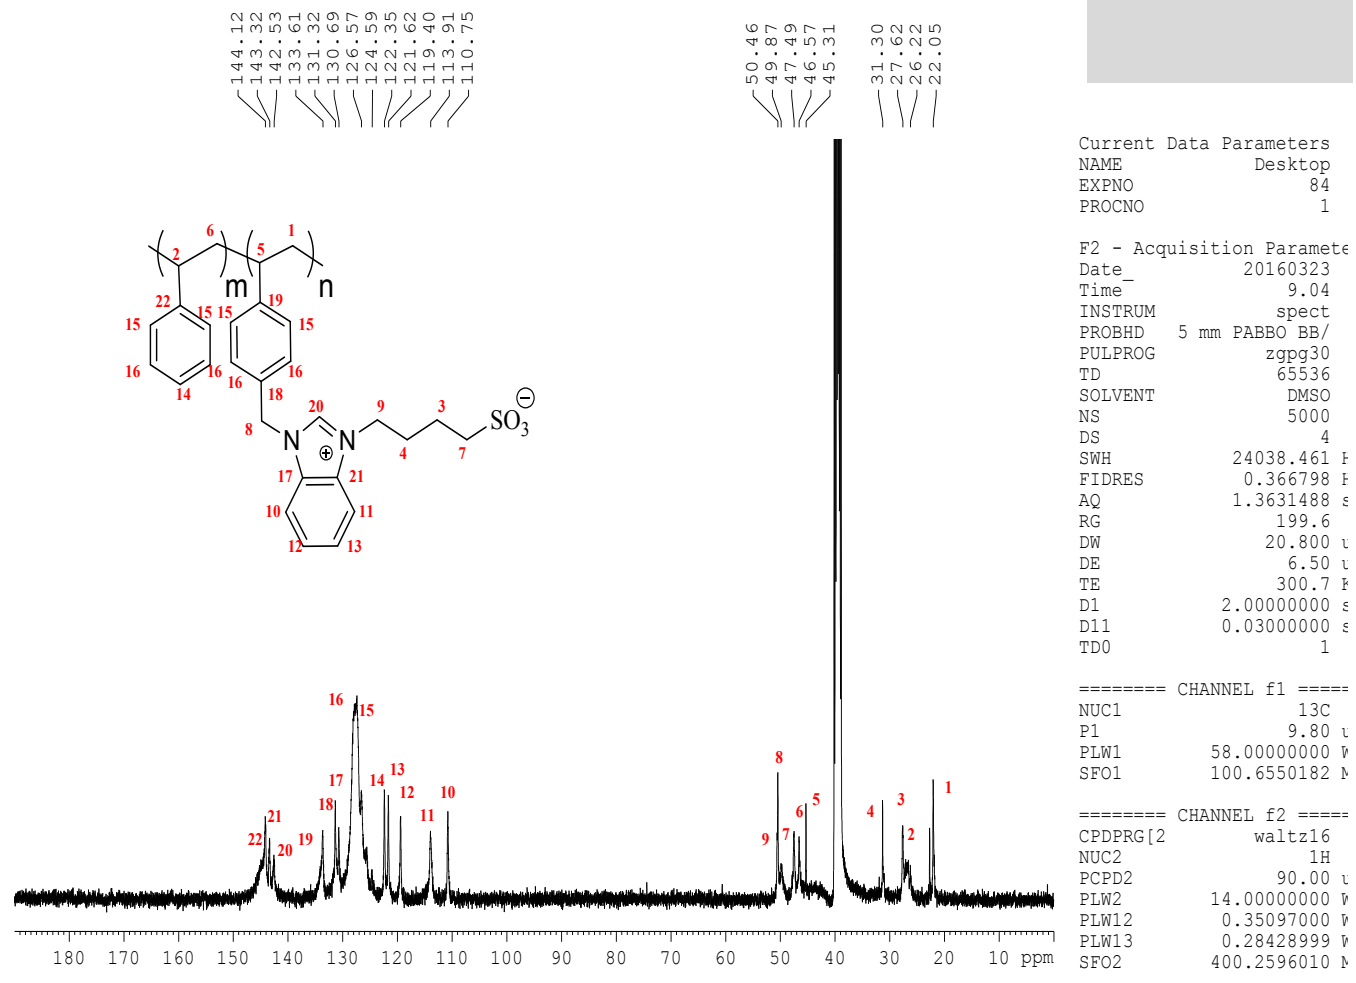

**Fig. S8:**  $^{13}\text{C}$  NMR spectrum of the poly-(4-(1-(4-vinylbenzyl)-1H-benzimidazol-co-styrene-3-yl)butane-1-sulphonate (DMSO- $d_6$ ).

Signature SIF VIT VELLORE  
AGK-12

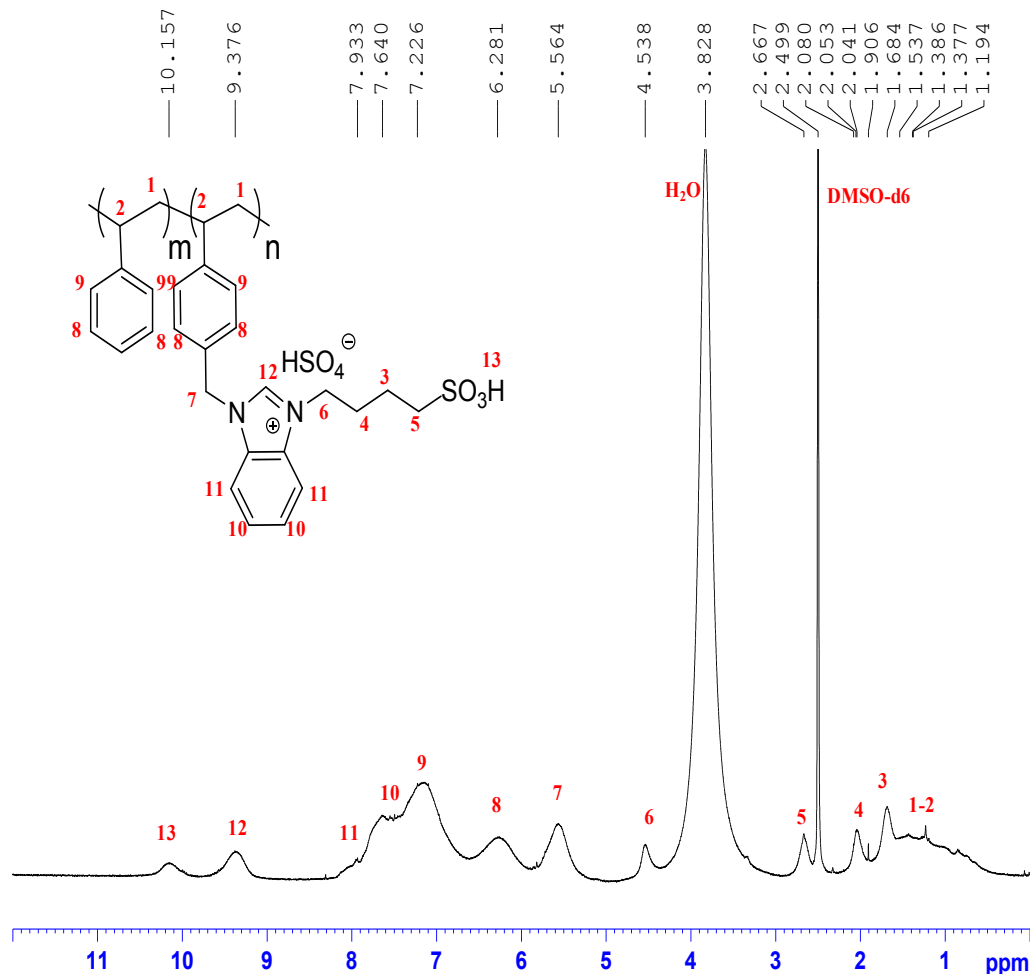

Current Data Parameters  
NAME 29-06-14  
EXPNO 33  
PROCNO 1

F2 - Acquisition Parameters  
Date\_ 20140629  
Time\_ 14.43  
INSTRUM spect  
PROBHD 5 mm PABBO BB/  
PULPROG zg30  
TD 65536  
SOLVENT DMSO  
NS 16  
DS 2  
SWH 8223.685 Hz  
FIDRES 0.125483 Hz  
AQ 3.9845889 sec  
RG 98.85  
DW 60.800 usec  
DE 6.50 usec  
TE 295.7 K  
D1 1.00000000 sec  
TD0 1

===== CHANNEL f1 =====  
NUC1 1H  
P1 14.25 usec  
PLW1 14.00000000 W  
SFO1 400.2604718 MHz

F2 - Processing parameters  
SI 65536  
SF 400.2580052 MHz  
WDW EM  
SSB 0  
LB 0.30 Hz  
GB 0  
PC 1.00

Fig. S9: <sup>1</sup>H NMR of the SBPIL (DMSO-d<sub>6</sub>).

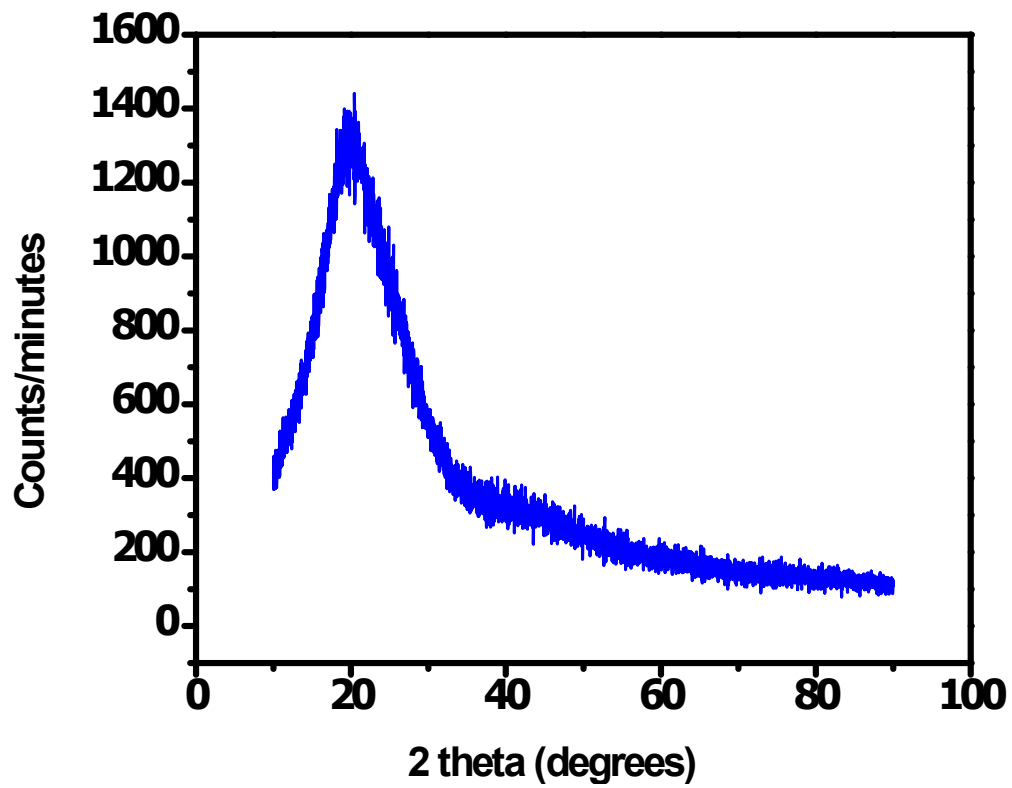

Fig. S10: XRD pattern of SBPIL.

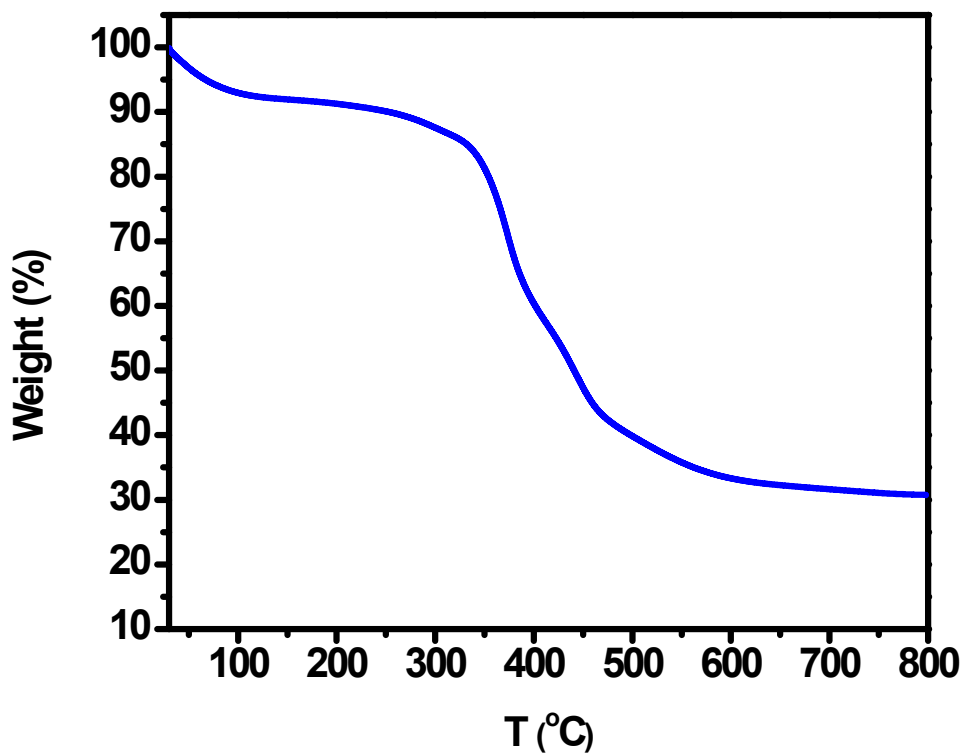

**Fig. S11:** Thermogravimetric analysis (TGA) of SBPIL.

Thermogravimetric analysis was studied for determining the stability of SBPIL (fig. S11). The TGA curve shows that initial weight loss of 5.44% was observed at 97 °C due to physically adsorbed water while the second major loss of 30.73% starts from 321 °C to 405 °C. This weight loss occurred between 321 °C to 405 °C is due to the alkyl sulphonic groups. The third weight loss of 39.78% was seen from 405 °C to 549 °C which could be due to poly(1-(4-Vinylbenyl-1H-benzimidazole-co-styrene) in SBPIL.

It is clear from this study that SBPIL starts getting decomposed only after 321 °C indicating its thermal stability and thus it can be used for waste water treatment even at higher temperatures.
